# Supplementary material for: Improving low-energy boron/nitrogen ion implantation in graphene by ion bombardment at oblique angles
Source: Royal Society of Chemistry journal article supplement (doi:10.1039/c6nr00983b), 2016-01-01
Supplement: c6nr00983b1.pdf [file c6nr00983b1.pdf]

## Electronic Supplementary Information (ESI)

### Improving Low-Energy Boron/Nitrogen Ion Implantation in Graphene by Ion Bombardment at Oblique Angles

Zhitong Bai,<sup>a</sup> Lin Zhang,<sup>a</sup> and Ling Liu<sup>a\*</sup>

<sup>a</sup> Department of Mechanical and Aerospace Engineering, Utah State University, Logan, UT 84322, USA

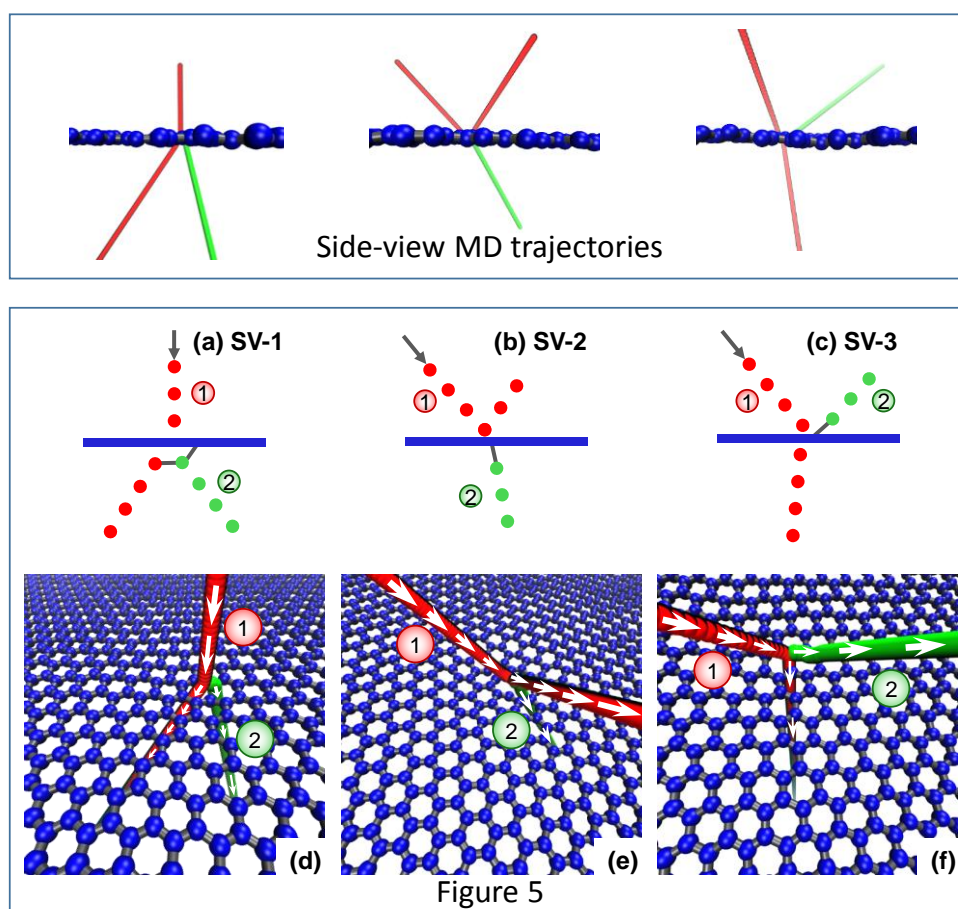

**Figure S1.** Side-view MD trajectories that complement the snapshots shown in Figure 5(d-f). These side-view MD trajectories can be directly compared with the mechanism schematics shown in Figure 5(a-c).

\* Email: [ling.liu@usu.edu](mailto:ling.liu@usu.edu)

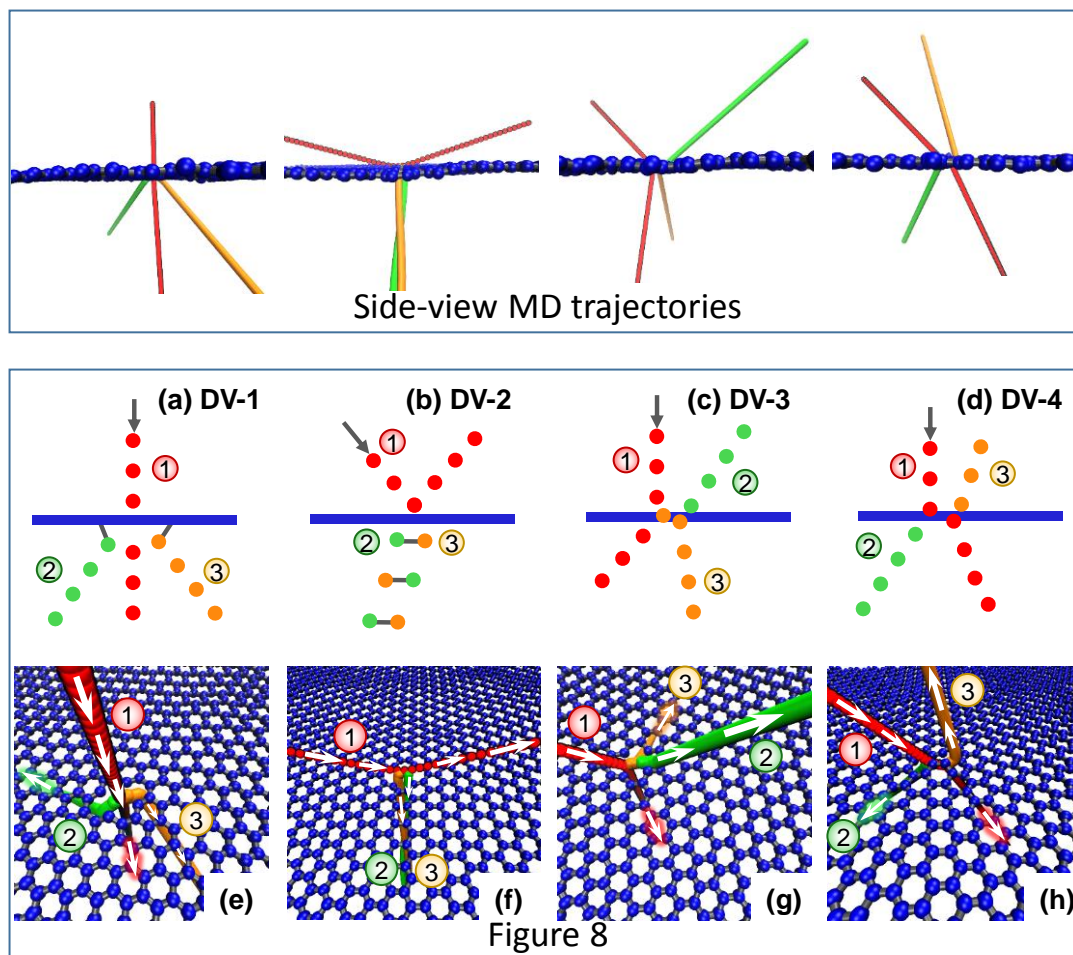

**Figure S2.** Side-view MD trajectories that complement the snapshots shown in Figure 8(e-h). These side-view MD trajectories can be directly compared with the mechanism schematics shown in Figure 8(a-d).
